# Supplementary material
Source: PubMed Central journal article supplement (PMC6015732)
Supplement: NIHMS972782-supplement-Suppl.pdf [file NIHMS972782-supplement-Suppl.pdf]

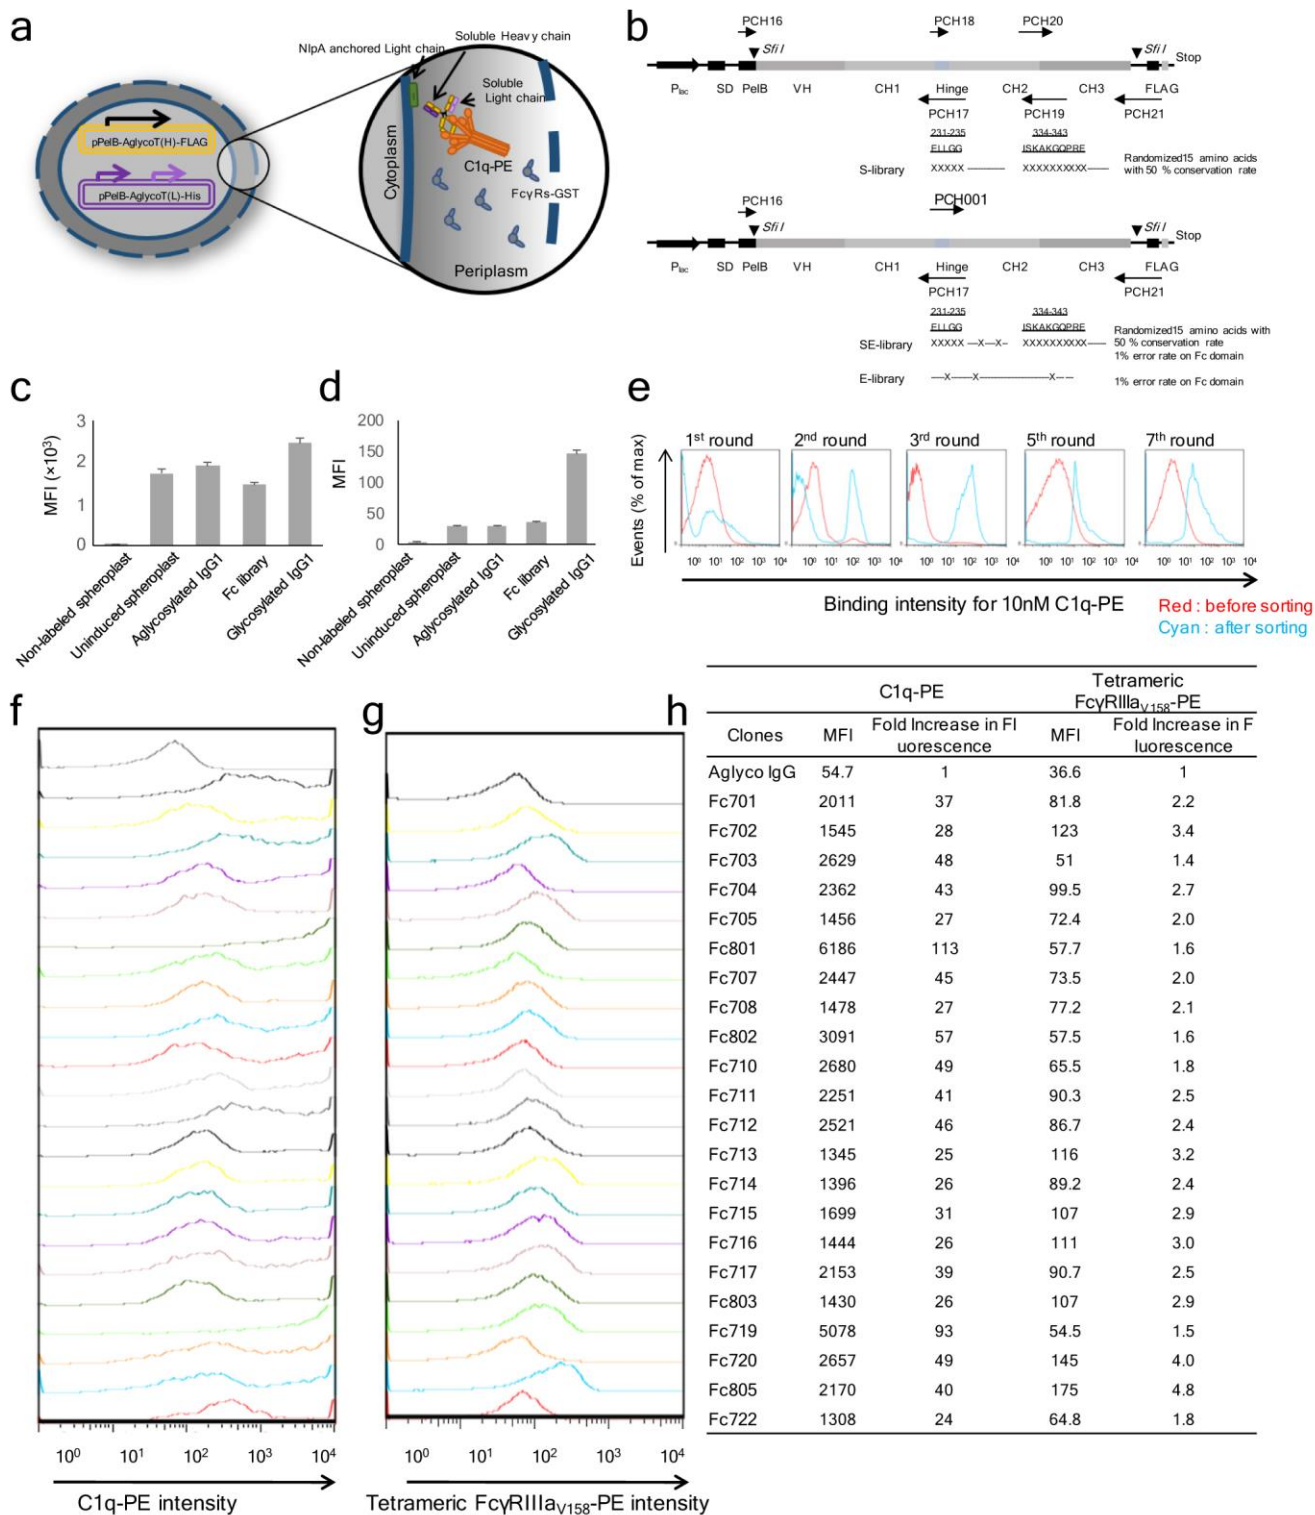

**Supplementary Figure 1**

**Engineering of C1q-specific IgG antibodies.**

(a) Schematic illustration of aglycosylated IgG display system for Fc engineering. Soluble C1q-PE competes with non-fluorescent FcγRs-GST for

binding to the displayed IgG variants on the surface of bacterial spheroplasts before FACS sorting. **(b)** Schematic illustration of the construction of the three sub-libraries of mutated Fc domains: S-library: randomization of the focused 15 amino acids; E-library: random mutagenesis on Fc domain by error prone PCR with 1% error rate; SE-library: random mutagenesis of the S-library gene pool by error prone PCR with 1% error rate. The sizes of sub-libraries were  $2 \times 10^8$  (S-library),  $3 \times 10^8$  (SE-library), and  $1 \times 10^9$  (E-library). **(c)** C1q does not bind to IgG-displaying *E.coli* spheroplasts in high salt buffer (50 mM phosphate, 330 mM NaCl, pH 7.4). Since *E.coli* cannot synthesize glycosylated antibodies, *E.coli* cells were engineered to display an antigen (PA domain 4) on the inner membrane and then the spheroplasted cells were incubated with the very high affinity anti-PA domain 4 antibody, M18. Binding to C1q to the surface-bound C1q was detected by FACS using 10 nM C1q-PE. **(d)** Flow cytometry analysis of C1q binding onto IgG-displaying *E.coli* spheroplasts in high salt buffer. **(e)** Flow cytometry analysis of *E.coli* library spheroplasts labeled with 10 nM C1q-PE before (Red) and after sorting (Cyan). **(f-g)** Fluorescent histogram of isolated IgG variants binding to 10 nM of C1q-PE in high salt phosphate buffer **(f)** or to 10 nM of tetrameric Fc $\gamma$ RIIIa<sub>V158</sub>-PE in PBS **(g)**. **(h)** MFI and fold increase in MFI following incubation with C1q or tetrameric Fc $\gamma$ RIIIa<sub>V158</sub> relative to cells unmutated aglycosylated IgG.

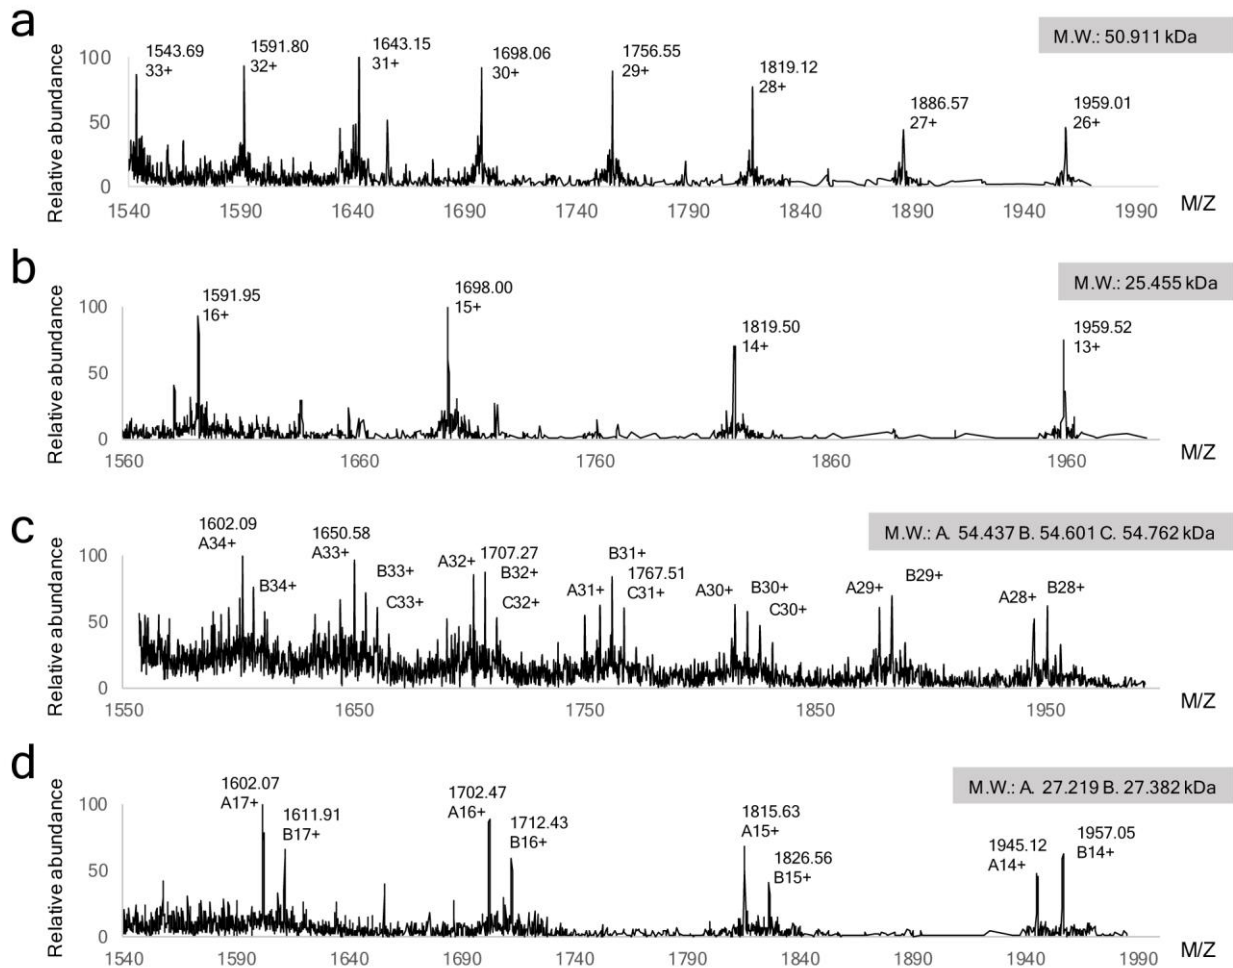

## Supplementary Figure 2

### LC-MS/MS spectra of 801 Fc.

Purified A801 Fc (**a-b**) or G801 Fc (**c-d**) was examined without (**a** & **c**) or with (**b** & **d**) 160 mM of dithiothreitol (DTT). Molecular weight (M.W.) estimated from the LS-MS data are shown; the respective calculated masses were presented at top of each plot. In (**c**) and (**d**) multiple predominant species detected are a consequence of glycan heterogeneity.

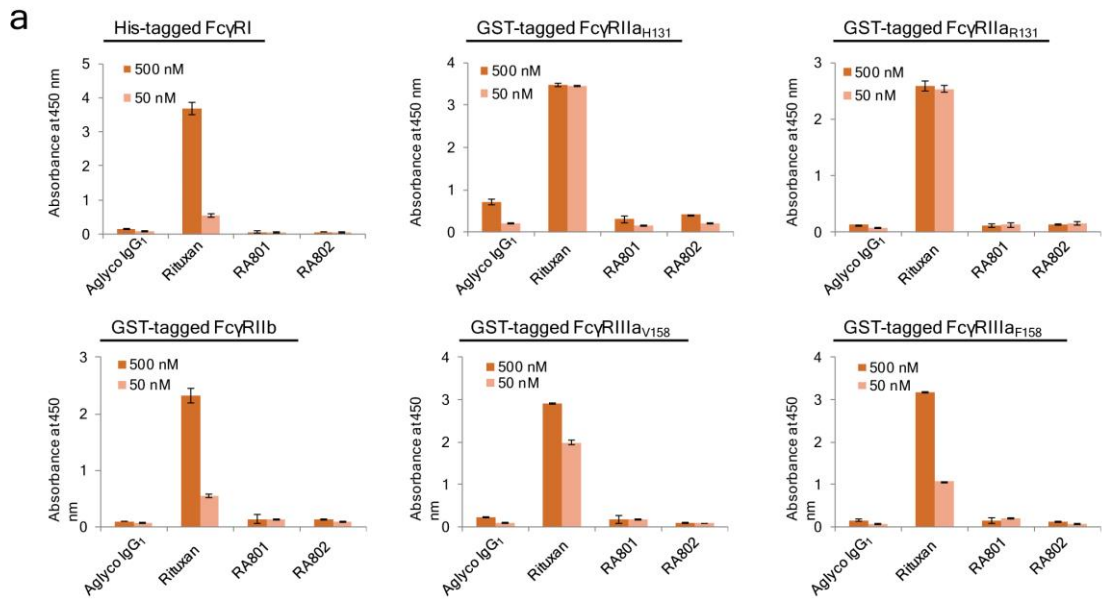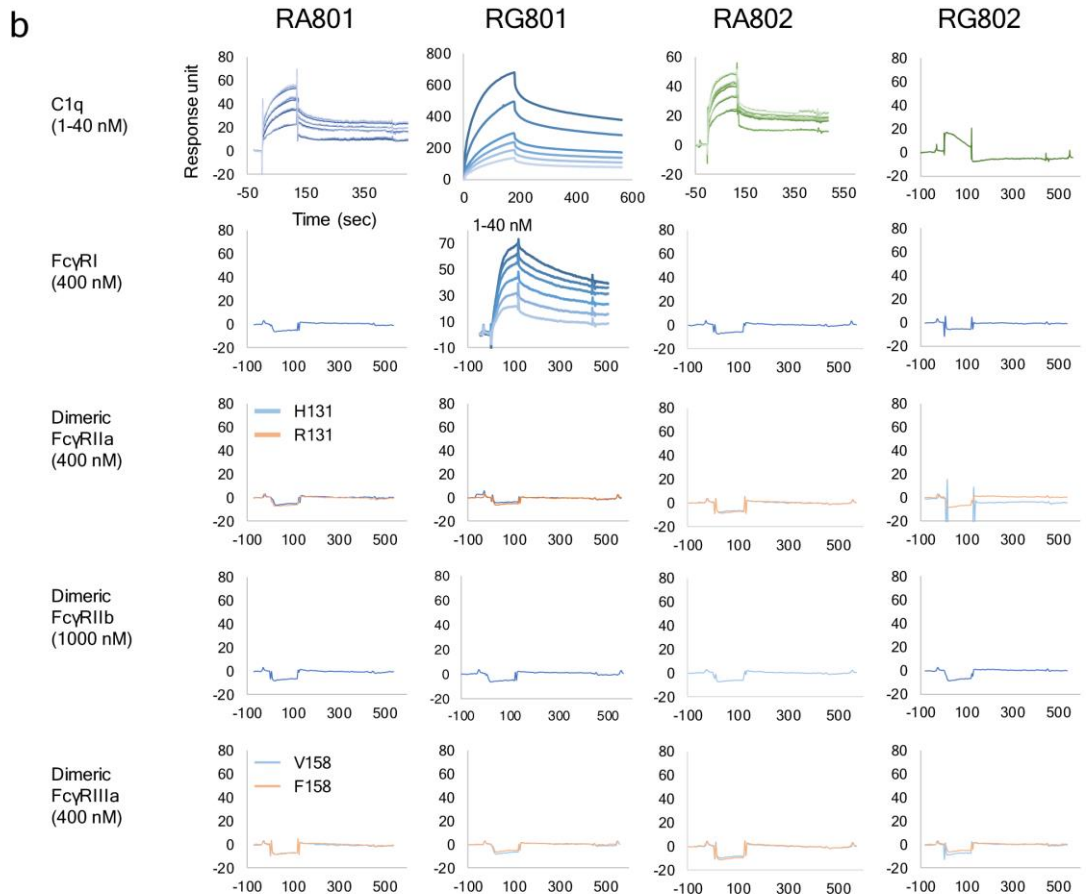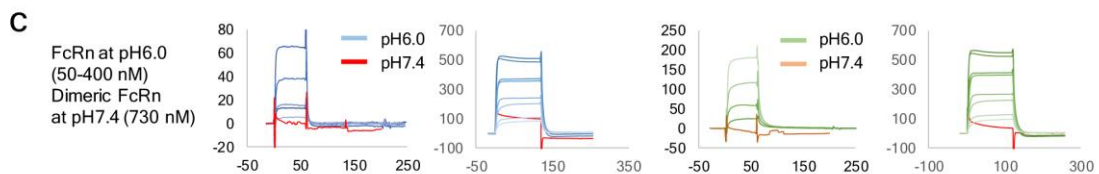

### Supplementary Figure 3

#### Binding analysis of RA801 or RA802 to human C1q, FcγRs and FcRn.

(a) ELISA analysis of C1q-specific antibody variants binding to human FcγRs. ELISA plates were coated with aglycosylated IgG1 (negative control), glycosylated IgG1 (Rituxan, positive control), RA801 or RA802. 500 nM or 50 nM of his-tagged FcγRI, GST-tagged FcγRIIa<sub>H131</sub>, GST-tagged FcγRIIa<sub>R131</sub>, GST-tagged FcγRIIb, GST-tagged FcγRIIIa<sub>V158</sub>, or GST-tagged FcγRIIIa<sub>F158</sub> was added and binding was detected using anti-His IgG conjugated to HRP or anti-GST IgG-HRP, accordingly. Errors bars: standard deviations from triplicate experiments. (b-c) SPR analysis of C1q-specific antibody variants. (b) SPR analysis of antibody binding to purified C1q or to effector Fcγ receptors. Antibody variants were immobilized on CM5 chips. The binding of C1q, or of GST fusion proteins high affinity FcγRI, or low affinity FcγRIIa, FcγRIIb, or FcγRIIIa, all expressed as dimers, to enhance binding, was assayed. (c) pH-dependent binding to human FcRn. In all sensorgrams, x-axis is time (sec) and y-axis is RU (response unit). Data are from one experiment representative of three experiments (a-c).

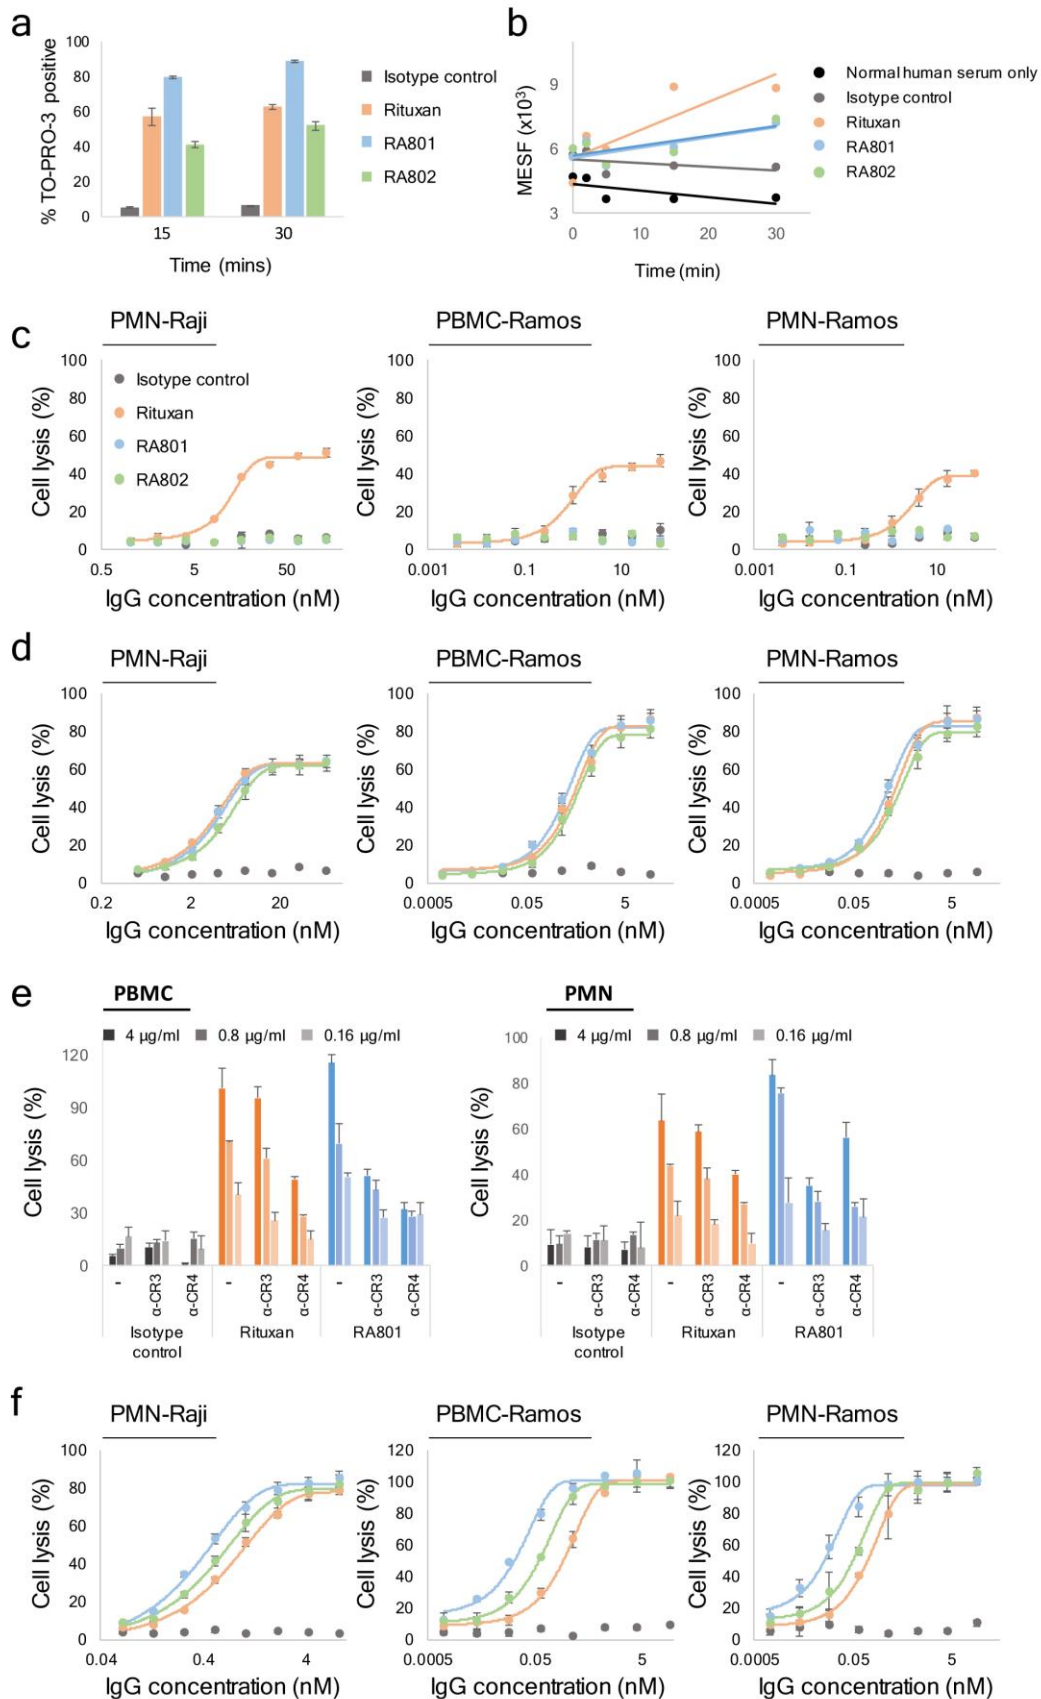

## Supplementary Figure 4

### Complement-mediated tumor-cell killing by C1q-specific antibody variants.

(a) CDC assays with Daudi cells. 10 µg/ml of each antibody was incubated with 50 % of PHS and CD20<sup>+</sup> Daudi cells for 15 mins and 30 mins. Lysed cells were detected by TO-PRO-3. (b) C1q deposition on mAb-opsonized CD20<sup>+</sup> cells. Time course for C1q deposition on CD20<sup>+</sup> Raji cells. Raji cells were incubated in 5% NHS and 10 µg/ml mAb for different time periods at 37°C. Cells were washed twice, incubated with FITC-conjugated anti-C1q and assayed by flow cytometry. MFI were converted to molecules of equivalent soluble fluorochrome (MESF) using calibrated beads (Spherotech). (c-d) CD20<sup>+</sup> cancer cells killing activities by PBMC or PMNs. Raji (or Ramos) cells incubated with effector cells in RPMI1640 medium without serum (c) or with 25% of C9-depleted serum (d). (e) Effect of α-CR3 or α-CR4 antibodies in CDCC. Rituximab (or RA801)-opsonized Ramos cells were incubated with: 10µg/ml of α-CR3 Ab (or α-CR4 Ab)-coated effector cells in RPMI1640 medium supplemented with 25% C9-depleted serum. (f) Cell killing of CD20<sup>+</sup> cancer cells by effector cells in the presence of serum. Cell lysis of CD20<sup>+</sup> cells with effector cells in RPMI1640 medium supplemented with 25% PHS. In c-f, % of cell lysis was determined 4 hours after the addition of cells and antibody. In all assays, the percent of tumor cell lysis was calculated according to the following formula:  $100 \times (E-S)/(M-S)$ , where E is the fluorescence of the experimental well, S is the fluorescence in the absence of antibody (tumor cells incubated with medium and complement alone), and M is that of tumor cells with lysis buffer (Triton® X-100 at 2% v/v, SDS at 1% w/v, 100 mM NaCl, and 1 mM EDTA). In all assays, PMN cells were stimulated by incubation with 10 ng/mL GM-CSF and trastuzumab-IgG was used as a negative control. Errors bars indicate the standard deviation (s.d.) from triplicate experiments. Data are from one experiment representative of three experiments.

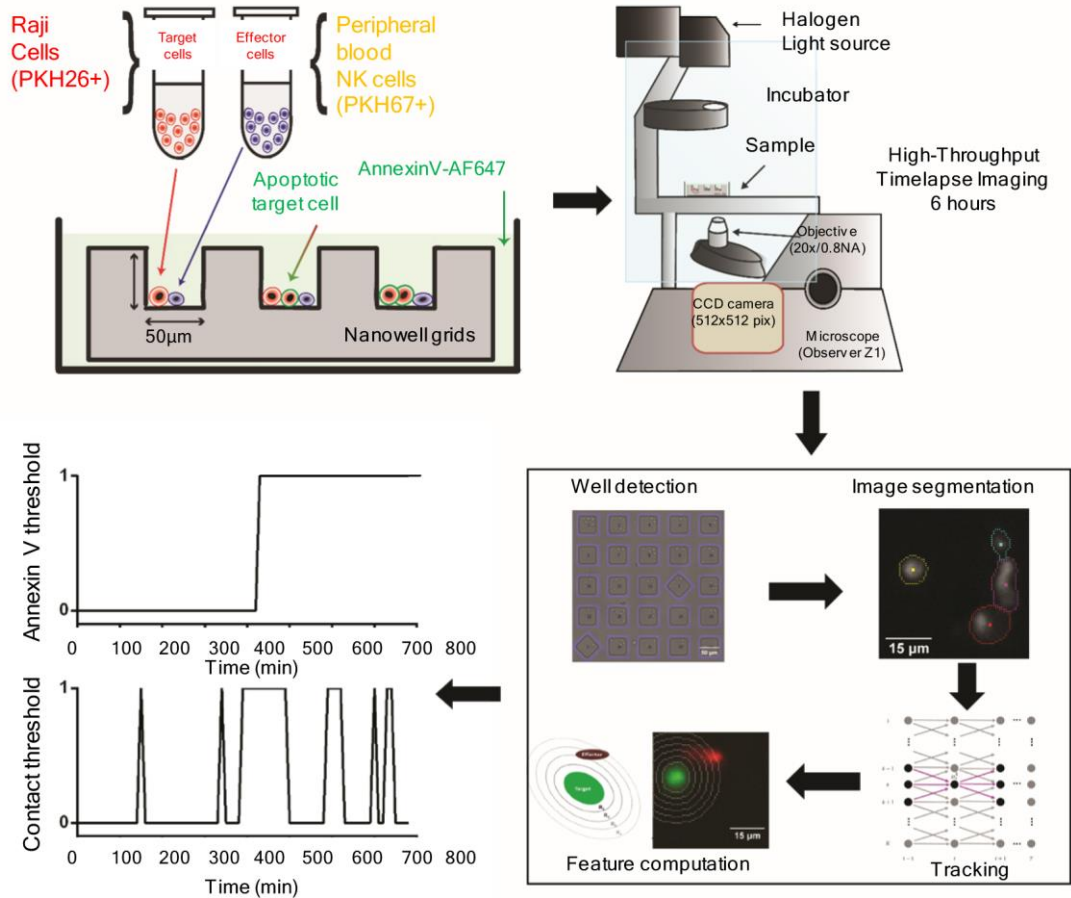

**Supplementary Figure 5**

**Time-lapse imaging in nanowell grids (TIMING).**

Raji tumor cells and NK cells are stained with PKH26 and PKH67 respectively, deposited *en masse* on a grid containing thousands of nanowells, immersed in fluorescent annexin V-containing medium and imaged for 6 h by high throughput timelapse microscopy. Imaging data were analyzed as described (Merouane Bioinformatics).



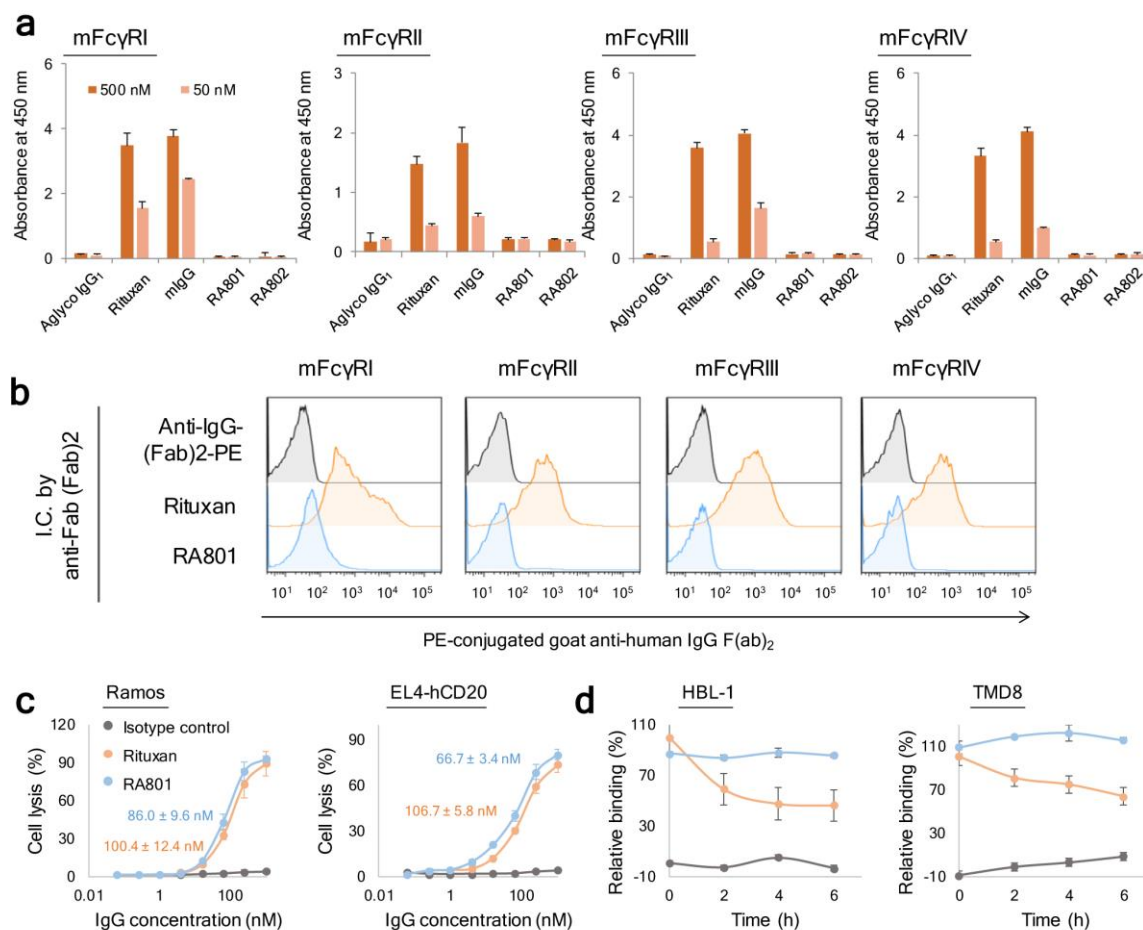

## Supplementary Figure 6

### Mouse complement activation of C1q-specific antibody variants and FcγR-mediated internalization in CD20<sup>+</sup>FcγRIIb<sup>+</sup> cancer cells.

(a) Binding RA801 and RA802 to mouse FcγRs. Microtiter well plates were coated with aglycosylated IgG1 (negative control), glycosylated IgG1 (Rituxan, positive control), mIgG, RA801, or RA802. His-tagged mFcγRs were added and binding was detected using anti-His IgG conjugated to HRP. Errors bars: standard deviations from triplicate experiments. (b) Lack of binding of RA801 immune complexes to mouse FcγRs expressed on CHO cells. The binding activities of performed ICs made of RA801 or Rituxan with PE-conjugated F(ab')<sub>2</sub> goat anti-human IgG F(ab')<sub>2</sub>. (c) CDC assays with pooled mouse serum (PMS). CDC assays of CD20<sup>+</sup> cells by RA801 with PMS. Experimental conditions for CDC assays of Ramos cells as in **Supplementary Fig. 4**. Calcein-loaded EL4-hCD20 cells were incubated with 50 % of PMS and serially diluted antibodies for 4 hrs. EC<sub>50</sub> values were presented in the plot (Orange: Rituxan, Blue: RA801). (d) α-CD20 antibody internalization in CD20<sup>+</sup>FcγRIIb<sup>+</sup> cancer cells, HBL-1 or TMD8. CD20<sup>+</sup>FcγRIIb<sup>+</sup> cancer cells were incubated with 100 nM of RA801 or RA802 for 0, 2, 4, or 6 h. Surface bound IgG was detected by flow cytometry using FITC conjugated goat anti-human Fc. (Abcam). In all assays, trastuzumab-IgG was used as a negative control and errors bars indicate the s.d. from triplicate experiments. Data are from one experiment representative of three experiments.

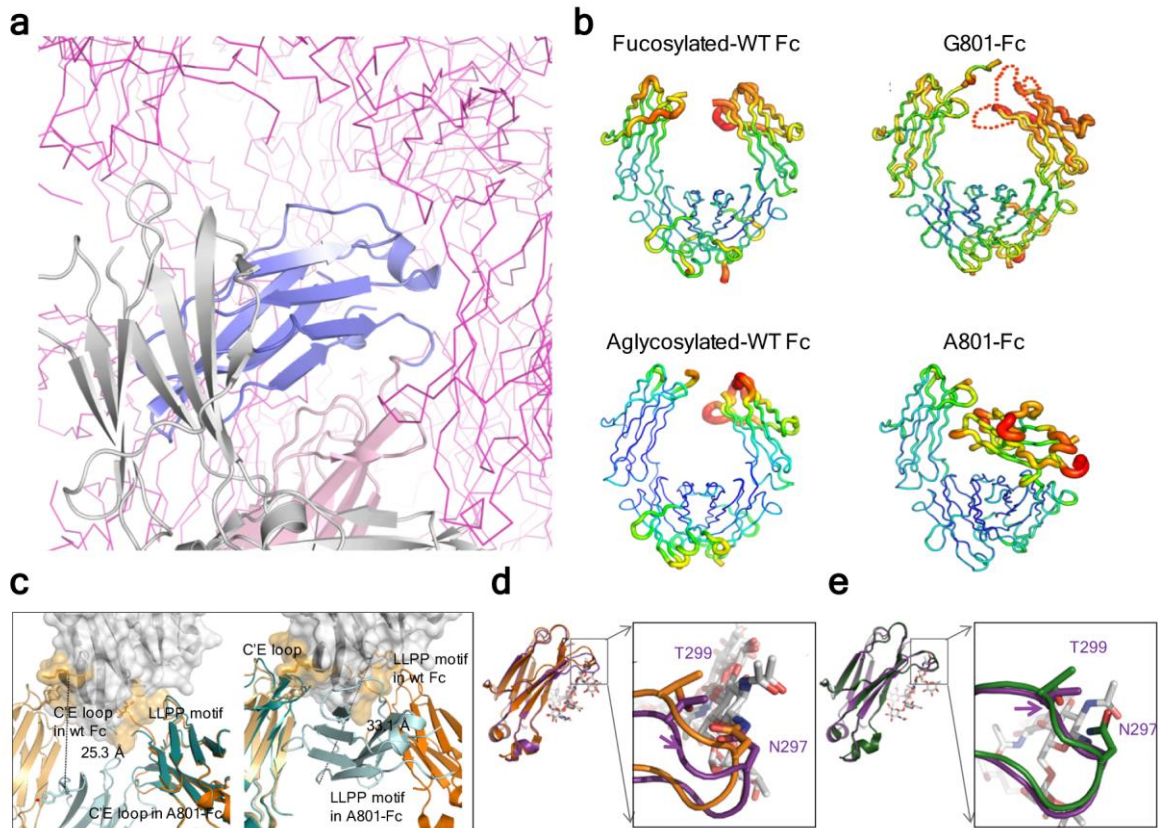

## Supplementary Figure 7

### Structural analysis of C1q-specific Fc variants.

(a) Crystal packing environment for A801-Fc. The crystallographic packing lattice is shown for A801-Fc (PDB ID: 5V43). The dimer from one asymmetric unit is shown in cartoon representation, with C $\gamma$ 2<sub>A</sub> in white; C $\gamma$ 2<sub>B</sub> in blue; and C $\gamma$ 3 in pink. Surrounding asymmetric units are shown in ribbon representation (magenta). No contacts or atomic clashes were observed between C $\gamma$ 2<sub>B</sub> and molecules from surrounding asymmetric units. (b) B factors distribution fucosylated-WT Fc (PDB ID: 3AVE), G801-Fc (PDB ID: 5V4E), aglycosylated-WT Fc (PDB ID: 3S7G), A801-Fc (PDB ID: 5V43). The coloring of the figure is based on the B factors gradient with lowest (blue) to highest (red). The dash line represents disordered regions. (c) Distance of Fc $\gamma$ R-binding motifs of Fc domain to Fc $\gamma$ RI (PDB ID: 4X4M). Fc $\gamma$ R is shown as a white transparent surface and the secondary structure of the whole complex is shown in ribbon. Two different regions on the Fc are both identified to be important for Fc $\gamma$ R and Fc complex formation: LLPP motif (important residue Leu235 is shown in sticks) and C'E loop. (d-e) Overlaid C $\gamma$ 2 and 'soft' C'E loop of 801-Fc with wild type Fc. (d) C $\gamma$ 2 of G801-Fc (PDB 5V4E, purple) was superimposed with fucosylated-WT Fc (orange, PDB: 3AVE). (e) G801-Fc (purple) was superimposed with aglycosylated-WT Fc (green, PDB: 3S7G). The 'soft' C'E loop of G801-Fc was highlighted by arrow. The glycan in PDB 3AVE is shown in white.

## Supplementary Information

**Supplementary Table 1. Primer list**

| Primer Name       | Primer nucleotide sequence (5'→ 3')                                                                                                                                                                                                                                                                                                                                                                                                                                                                                                                                                                                                     |
|-------------------|-----------------------------------------------------------------------------------------------------------------------------------------------------------------------------------------------------------------------------------------------------------------------------------------------------------------------------------------------------------------------------------------------------------------------------------------------------------------------------------------------------------------------------------------------------------------------------------------------------------------------------------------|
| PCH001            | CACCAAGGTCGACAAGAAAGTTG                                                                                                                                                                                                                                                                                                                                                                                                                                                                                                                                                                                                                 |
| PCH016            | GTTATTACTCGCGGCCAGCCG                                                                                                                                                                                                                                                                                                                                                                                                                                                                                                                                                                                                                   |
| PCH017            | GGGGAAGAGGAAGACTGACGGN(A10% T70% G10% C10%)N(A10% T10% G10% C70%)N(A10% T10% G10% C70%)N(A10% T10% G10% C70%)N(A10% T10% G10% C70%)N(A10% T10% G10% C70%)N(A70% T10% G10% C10%)N(A10% T10% G70% C10%)N(A10% T10% G70% C10%)N(A70% T10% G10% C10%)N(A10% T10% G70% C10%)N(A10% T70% G10% C10%)N(A10% T70% G10% C10%)N(A10% T10% G10% C70%)AGGTGCTGGGCACGGTGGG                                                                                                                                                                                                                                                                            |
| PCH018            | CCGTCAGTCTTCCTCTTCCCC                                                                                                                                                                                                                                                                                                                                                                                                                                                                                                                                                                                                                   |
| PCH019            | GGTTTTCTCGATGGGGGCTGGG                                                                                                                                                                                                                                                                                                                                                                                                                                                                                                                                                                                                                  |
| PCH020            | CCCAGCCCCCATCGAGAAAACCN(A70% T10% G10% C10%)N(A10% T70% G10% C10%)N(A10% T10% G10% C70%)N(A10% T70% G10% C10%)N(A10% T10% G10% C70%)N(A10% T10% G10% C70%)N(A70% T10% G10% C10%)N(A70% T10% G10% C10%)N(A70% T10% G10% C10%)N(A10% T10% G70% C10%)N(A10% T10% G10% C70%)N(A10% T10% G10% C70%)N(A70% T10% G10% C10%)N(A70% T10% G10% C10%)N(A10% T10% G70% C10%)N(A10% T10% G10% C70%)N(A70% T10% G10% C10%)N(A10% T10% G10% C70%)N(A10% T10% G10% C70%)N(A70% T10% G10% C10%)N(A10% T10% G70% C10%)N(A10% T10% G10% C70%)N(A10% T10% G70% C10%)N(A70% T10% G10% C10%)N(A70% T10% G10% C10%)N(A70% T10% G10% C10%)CCACAGGTGTACACCCTGCCC |
| PCH021            | CGGCCGCGAATTCGGCCCC                                                                                                                                                                                                                                                                                                                                                                                                                                                                                                                                                                                                                     |
| PCH022            | GGGGAAGAGGAAGACTGACGG                                                                                                                                                                                                                                                                                                                                                                                                                                                                                                                                                                                                                   |
| PCH023            | GGTTTTCTCGATGGGGGCTGGG                                                                                                                                                                                                                                                                                                                                                                                                                                                                                                                                                                                                                  |
| mFc $\gamma$ RI F | CCC AAG CTT GAA GTG GTT AAT GCC ACC AAG GCT G                                                                                                                                                                                                                                                                                                                                                                                                                                                                                                                                                                                           |

|                     |                                                                        |
|---------------------|------------------------------------------------------------------------|
| mFc $\gamma$ RI R   | CCA GCT CGA GAG GAG CTG ATG ACT GGG GAC CAA G                          |
| mFc $\gamma$ RII F  | CCC AAG CTT ACT CAT GAT CTT CCA AAG GCT GTG GTC                        |
| mFc $\gamma$ RII R  | CCA GCT CGA GTG GTA AAG ACC TGC TGG ACT TGG GC                         |
| mFc $\gamma$ RIII F | CCC AAG CTT GCT CTT CCG AAG GCT GTG GTG AAA C                          |
| mFc $\gamma$ RIII R | CCA GCT CGA GAG TGT GGT ACC AGA CTA GAG AGA TGG                        |
| mFc $\gamma$ RIV F  | CCC AAG CTT GGT CTC CAA AAG GCT GTG GTG AAC C                          |
| mFc $\gamma$ RIV R  | CCA GCT CGA GAT CGC CTA GGC TTA TAC GAA AGG ATG CT                     |
| E320D For           | GAC TGG CTG AAT GGC AAG GAG TAC GAT TGC AAG GTC TCC AAC AAA GCC<br>CTC |
| E320D Rev           | GAG GGC TTT GTT GGA GAC CTT GCA ATC GTA CTC CTT GCC ATT CAG CCA GTC    |
| R386K For           | GTG GAG TGG GAG AGC AAT GGG AAG CCG GAG AAC AAC TAC AAG ACC ACA C      |
| R386K Rev           | GTG TGG TCT TGT AGT TGT TCT CCG GCT TCC CAT TGC TCT CCC ACT CCA C      |

**Supplementary Table 2.** EC<sub>50</sub> values of OA801 and OA802 by CDC in Raji and Ramos cells. Data are average values  $\pm$  SD.

|            | EC <sub>50</sub> (nM)/Fold | Tumor cells |
|------------|----------------------------|-------------|
| Ofatumumab | 3.43 $\pm$ 1.90            |             |
| OA801      | 1.83 $\pm$ 0.23 / 1.9      | Raji cells  |
| OA802      | 2.30 $\pm$ 0.17 / 1.5      |             |
| Ofatumumab | 0.25 $\pm$ 0.02            |             |
| OA801      | 0.06 $\pm$ 0.01 / 4.1      | Ramos cells |
| OA802      | 0.11 $\pm$ 0.01 / 2.2      |             |

**Supplementary Table 3. C $\gamma$ 2/C $\gamma$ 3 dihedral-angles in IgG1 Fc domains in the PDB**

| <b>C<math>\gamma</math>2/C<math>\gamma</math>3 Dihedral-Angle (°)</b> |                |                |
|-----------------------------------------------------------------------|----------------|----------------|
|                                                                       | <b>Chain A</b> | <b>Chain B</b> |
| <b>A801</b>                                                           | -20.5          | 136            |
| <b>G801</b>                                                           | -21.1          | -22.4          |
| <b>1FC1</b>                                                           | -21            | -24.6          |
| <b>1H3T</b>                                                           | -33.1          | -17.6          |
| <b>1H3U</b>                                                           | -28.4          | -27.7          |
| <b>1H3V</b>                                                           | -30.5          | -20.7          |
| <b>1H3W</b>                                                           | -27.5          | NA             |
| <b>1H3Y</b>                                                           | -28.5          | -20.4          |
| <b>1L6X</b>                                                           | -22.8          | NA             |
| <b>2DTS</b>                                                           | -28.6          | -28.9          |
| <b>3AVE</b>                                                           | -29.2          | -25.5          |
| <b>3DNK</b>                                                           | -31.8          | -24            |
| <b>3S7G</b>                                                           | -18.4          | -26.7          |
